# Supplementary material for: Highly efficient baculovirus-mediated multigene delivery in primary cells
Source: PubMed Central journal article supplement (PMC4857464; doi:10.1038/ncomms11529), 2016-05-04
Supplement: ncomms11529-s4.pdf [file ncomms11529-s4.pdf]

**Transferred manuscripts:**

Editorial Note: this manuscript has been previously reviewed at another journal that is not operating a transparent peer review scheme. This document only contains reviewer comments and rebuttal letters for versions considered at Nature Communications.
